# Supplementary material for: Canine-Origin Platelet-Rich Fibrin as an Effective Biomaterial for Wound Healing in Domestic Cats: A Preliminary Study
Source: Vet Sci. 2021 Sep 30;8(10):213. doi: 10.3390/vetsci8100213 (PMC8539014; doi:10.3390/vetsci8100213)
Supplement: Supplementary file 1 [file vetsci-08-00213-s001.zip › vetsci-1304087-supplementary.pdf]

## Supplementary Materials

**Table S1.** Therapeutic schedule instituted for each cat during the PRFs' treatment period

| Case | Pharmacological Treatment Instituted                                                                                                                                                                       |
|------|------------------------------------------------------------------------------------------------------------------------------------------------------------------------------------------------------------|
| #1   | Meloxicam 0.1 mg/kg once a day, orally, during 5 consecutive days;                                                                                                                                         |
|      | Amoxicillin-clavulanic acid 20 mg/kg twice a day, orally, for 8 days;                                                                                                                                      |
|      | Methadone 0.3 mg/ kg twice a day, subcutaneously, in the 24 hours after the orthopaedic surgery;                                                                                                           |
| #2   | Meloxicam 0.1 mg/kg once a day, orally, during 5 consecutive days;                                                                                                                                         |
|      | Amoxicillin-clavulanic acid 20 mg twice a day, orally, for 8 days;                                                                                                                                         |
|      | Methadone 0.3 mg/ kg q twice a day, subcutaneously, in the 48 hours after the orthopaedic surgery;                                                                                                         |
| #3   | Prolivet (Bioiberica) 100 mg once a day,, during 30 days;                                                                                                                                                  |
|      | Meloxicam 0.1 mg/kg once a day, orally, during 5 consecutive days;                                                                                                                                         |
|      | Clindamycin 8mg/kg twice a day, orally, for 10 days;                                                                                                                                                       |
| #4   | Meloxicam 0.1 mg/kg once a day, orally, during 5 consecutive days;                                                                                                                                         |
|      | Initial therapy with amoxicillin-clavulanic acid 20 mg/kg twice a day, orally, being substituted by doxycycline 10 mg/kg once a day, orally, for 28 consecutive days after <i>Bartonella</i> sp. diagnose; |
|      | Buprenorphine 0.02mg/kg twice a day, subcutaneously, during the initial 3 days.                                                                                                                            |
